# Supplementary material for: A Fatal Case of Native Valve Endocarditis with Multiple Embolic Phenomena and Invasive Methicillin-Resistant Staphylococcus aureus Bacteremia: A Case Report from the Maldives
Source: MDPI journal article supplement (doi:10.3390/tropicalmed8010053), 2023-01-10
Supplement: s1 [file s1]

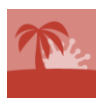

## Case Report

# A fatal case of native valve endocarditis with multiple embolic phenomena and invasive methicillin-resistant *Staphylococcus aureus* bacteremia: a case report from the Maldives.

Ali Shafeeq<sup>1</sup>, Hisham Ahmed Imad<sup>2,3,4\*</sup>, Ahmed Azhad<sup>1</sup>, Migdhaadh Shareef<sup>1</sup>, Mohamed Shaneez Najmy<sup>1</sup>, Mohamed Mausool Siraj<sup>1</sup>, Mohamed Sunil<sup>1</sup>, Rimsha Rafeeu<sup>5</sup>, Aishath Sofa Moosa<sup>5</sup>, Ahmed Shaheed<sup>6</sup>, Thundon Ngamprasertchai<sup>3,7</sup>, Wasin Matsee<sup>3,7</sup>, Pyae Linn Aung<sup>2</sup>, Wang Nguitrugool<sup>2,8</sup> and Tatsuo Shioda<sup>4</sup>

<sup>1</sup> National Cardiac Center, Indira Gandhi Memorial Hospital, Malé, Maldives

<sup>2</sup> Mahidol Vivax Research Unit, Faculty of Tropical Medicine, Mahidol University, Bangkok 10400, Thailand

<sup>3</sup> Thai Travel Clinic, Hospital for Tropical Diseases, Bangkok 10400, Thailand

<sup>4</sup> Center for Infectious Disease Education and Research, Department of Viral Infections, Research Institute for Microbial Diseases, Osaka University, Suita 565-0871, Osaka, Japan

<sup>5</sup> Trauma and Emergency, Indhira Gandhi Memorial Hospital, Malé 2002, Maldives

<sup>6</sup> Department of Medicine, Indhira Gandhi Memorial Hospital, Malé 2002, Maldives

<sup>7</sup> Department of Clinical Tropical Medicine, Faculty of Tropical Medicine, Mahidol University, Bangkok 10400, Thailand

<sup>8</sup> Department of Molecular Tropical Medicine and Genetics, Faculty of Tropical Medicine, Mahidol University, Bangkok 10400, Thailand

\* Correspondence: hishamahmed.ima@mahidolac.th or imad@biken.osaka-u.ac.jp

**Table S1** Antibiotic sensitivity pattern of *S. aureus* isolated from blood culture after 72 hours of incubation.

| Organism                     | Antibiotic Class   | Antibiotics      | MIC (µg/mL) | Interpretation |
|------------------------------|--------------------|------------------|-------------|----------------|
| <i>Staphylococcus aureus</i> | Beta-lactam        | Oxacillin        | ≥ 4.0       | Resistant      |
| <i>Staphylococcus aureus</i> | Beta-lactam        | Benzylpenicillin | ≥ 0.5       | Resistant      |
| <i>Staphylococcus aureus</i> | Aminoglycoside     | Gentamicin       | ≤ 0.5       | Sensitive      |
| <i>Staphylococcus aureus</i> | Quinolone          | Ciprofloxacin    | ≤ 0.5       | Sensitive      |
| <i>Staphylococcus aureus</i> | Fluoroquinolone    | Levofloxacin     | 0.25        | Sensitive      |
| <i>Staphylococcus aureus</i> | Glycopeptide       | Vancomycin       | 1.0         | Sensitive      |
| <i>Staphylococcus aureus</i> | Oxazolidinones     | Linezolid        | 2.0         | Sensitive      |
| <i>Staphylococcus aureus</i> | Antimycobacterials | Rifampicin       | ≤ 0.03      | Sensitive      |
| <i>Staphylococcus aureus</i> | Glycycline         | Tigecycline      | ≤ 0.12      | Sensitive      |
| <i>Staphylococcus aureus</i> | Lipopeptide        | Daptomycin       | ≤ 1.0       | Sensitive      |
| <i>Staphylococcus aureus</i> | Tetracycline       | Tetracyclines    | ≤ 1.0       | Sensitive      |
| <i>Staphylococcus aureus</i> | Lincosamide        | Clindamycin      | ≤ 0.5       | Sensitive      |

MIC: Minimal inhibitory concentration

**Table S2.** Modified Dukes criteria for infective endocarditis

| Major criteria                              | Case presented                   |
|---------------------------------------------|----------------------------------|
| Supportive laboratory evidence <sup>a</sup> | Positive blood cultures for MRSA |

| Evidence of endocardial involvement <sup>b</sup>                    | Vegetation on mitral valve            |
|---------------------------------------------------------------------|---------------------------------------|
| <b>Minor criteria</b>                                               |                                       |
| Predisposing heart condition or IVDU                                | Active IVDU                           |
| Fever > 38°C                                                        | Febrile at presentation               |
| Vascular phenomenon <sup>c</sup>                                    | Multiple Janeway lesions present      |
| Immunological phenomenon <sup>d</sup>                               | Osler's nodes and Roths spots present |
| Positive blood culture not meeting the Major criterion <sup>e</sup> | -                                     |

<sup>a</sup> Typical microorganism of infective endocarditis from two separate blood cultures: Viridians streptococci, *Staphylococcus aureus*, *Streptococcus bovis*, HACEK group or community acquired enterococci, in the absence of a primary focus. Additional a single positive culture for *Coxiella burnetii* or serology (antibody titre >1:800)

<sup>b</sup> Echocardiogram supportive of infective endocarditis. Definition of positive findings: Oscillating intracardiac mass, on valve or supporting structures, or in the path of regurgitation jets, or on implanted material, in the absence of an alternative anatomic explanation or myocardial abscess or new partial dehiscence of prosthetic valves. New valvular regurgitation.

<sup>c</sup> Major arterial emboli, septic pulmonary infarcts, mycotic aneurysm, intracranial hemorrhage, conjunctival hemorrhage, Janeway lesions.

<sup>d</sup> Glomerulonephritis, Osler's nodes, Roths spots, rheumatoid factor

<sup>e</sup> Excluding single positive cultures for coagulase-negative staphylococci and organism that do not cause endocarditis or serological evidence of active infection with organism consistent with infective endocarditis

IVDU: intravenous drug use, MRSA: methicillin-resistant *Staphylococcus aureus*

This table was obtained from a text book. "Infective endocarditis: a multidisciplinary approach. ISBN: 978-0-12-820657-7

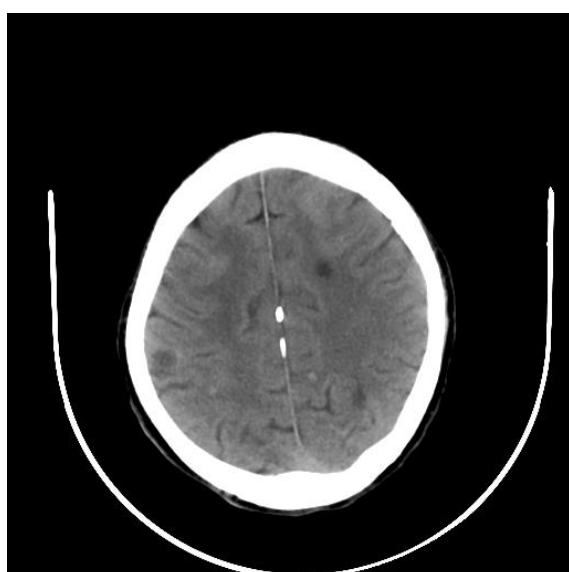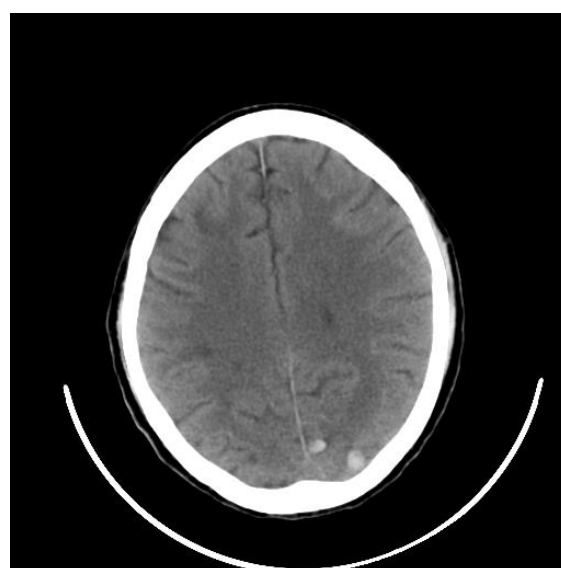

(a)

(b)

**Figure S1.** Computed tomography images depicting the coronal view of the brain (a) Bilateral multiple subcortical hypodense foci representing infarctions (b) Unilateral hyperdense foci consistent with hemorrhagic transformation.

**Table S3.** Comparison of the case presented with other similar cases of native valve infective endocarditis amongst intravenous drug user.

|                         | Present case                                                                                                                                 | Other cases                                                                                                                         |                                                                                                                                       |
|-------------------------|----------------------------------------------------------------------------------------------------------------------------------------------|-------------------------------------------------------------------------------------------------------------------------------------|---------------------------------------------------------------------------------------------------------------------------------------|
|                         |                                                                                                                                              | Case-1 <sup>35</sup>                                                                                                                | Case-2 <sup>36</sup>                                                                                                                  |
| General characteristics | <ul style="list-style-type: none"> <li>• 31-year-old male from the Maldives</li> <li>• IVDU (+)</li> <li>• No prior history of IE</li> </ul> | <ul style="list-style-type: none"> <li>• 26-year-old male from USA</li> <li>• IVDU (+)</li> <li>• No prior history of IE</li> </ul> | <ul style="list-style-type: none"> <li>• 36-year-old female from USA</li> <li>• IVDU (+)</li> <li>• No prior history of IE</li> </ul> |
| Presenting complaints   | <ul style="list-style-type: none"> <li>• Referred as a case of septicemia (Adjunct with a four days' history of fever fol-</li> </ul>        | <ul style="list-style-type: none"> <li>• Fever and cough for a week</li> </ul>                                                      | <ul style="list-style-type: none"> <li>• Fever and cough for two weeks</li> </ul>                                                     |

|                                       |                                                                                                                                                                                                      |                                                                                                                                                                                                                                                                                                                                                                  |                                                                                                                                                                                                                                                                  |
|---------------------------------------|------------------------------------------------------------------------------------------------------------------------------------------------------------------------------------------------------|------------------------------------------------------------------------------------------------------------------------------------------------------------------------------------------------------------------------------------------------------------------------------------------------------------------------------------------------------------------|------------------------------------------------------------------------------------------------------------------------------------------------------------------------------------------------------------------------------------------------------------------|
|                                       | lowed by decreased conscious level)                                                                                                                                                                  |                                                                                                                                                                                                                                                                                                                                                                  |                                                                                                                                                                                                                                                                  |
| Gasglow Coma Scale                    | • 10/15                                                                                                                                                                                              | 15/15                                                                                                                                                                                                                                                                                                                                                            | Not provided                                                                                                                                                                                                                                                     |
| Vitals at presentation                | <ul style="list-style-type: none"> <li>• Temperature: 38.1° C</li> <li>• Pulse: 142 beats per min.</li> <li>• Blood pressure: 88/58 mmHg</li> <li>• Respiratory rate: 52 breaths per min.</li> </ul> | • Hemodynamically stable                                                                                                                                                                                                                                                                                                                                         | <ul style="list-style-type: none"> <li>• Pulse: 124 beats per min.</li> <li>• Blood pressure: 112/59 mmHg</li> <li>• Respiratory rate: 27 breaths per min.</li> </ul>                                                                                            |
| Stigmata of infective endocarditis    | Janeway lesion<br>Osler's nodes<br>Splinter hemorrhages                                                                                                                                              | Janeway lesion<br>Osler's nodes                                                                                                                                                                                                                                                                                                                                  | Not present                                                                                                                                                                                                                                                      |
| Cardiovascular examinations findings  | <ul style="list-style-type: none"> <li>• Tachycardia</li> <li>• Pansystolic murmur (Grade-3 intensity)</li> </ul>                                                                                    | <ul style="list-style-type: none"> <li>• Regular rate and sinus rhythm</li> <li>• No murmur</li> </ul>                                                                                                                                                                                                                                                           | • Holo systolic murmur                                                                                                                                                                                                                                           |
| Echocardiographic findings            | <ul style="list-style-type: none"> <li>• Vegetation (30 x 18mm) on mitral valve</li> <li>• Ruptured chordae tendinae</li> <li>Mitral regurgitation</li> </ul>                                        | • Vegetation (15 x 13mm) on tricuspid valve                                                                                                                                                                                                                                                                                                                      | • Vegetation (18 x 24mm) on tricuspid valve                                                                                                                                                                                                                      |
| Hematological and inflammatory marker | <ul style="list-style-type: none"> <li>• Leukocytosis with thrombocytopenia</li> <li>• Elevated CRP</li> </ul>                                                                                       | • Not provided                                                                                                                                                                                                                                                                                                                                                   | • Leukocytosis                                                                                                                                                                                                                                                   |
| Isolated micro-organism from blood    | MRSA                                                                                                                                                                                                 | MRSA                                                                                                                                                                                                                                                                                                                                                             | MRSA                                                                                                                                                                                                                                                             |
| Other complications                   | • Septic embolization to brain, eye and extremities                                                                                                                                                  | • Septic embolization to lungs, spleen, kidneys, prostate, bladder, and extremities                                                                                                                                                                                                                                                                              | • Septic embolization to lungs                                                                                                                                                                                                                                   |
| Case mangement                        | <ul style="list-style-type: none"> <li>• Inotropic support</li> <li>• Mechanical ventilation</li> <li>• Vancomycin 20mcg/mL</li> </ul>                                                               | <ul style="list-style-type: none"> <li>• Excision of mitral valve left leaflet vegetation's and repair of mitral valve perforation.</li> <li>• Excision of the tricuspid valve chordal vegetation and repair of tricuspid valve chordal rupture</li> <li>• Repair of mitral valve perforation</li> <li>• Vancomycin, piperacilin-tazobactam, daptomy-</li> </ul> | <ul style="list-style-type: none"> <li>• Vancomycin, piperacilin-tazobactam, clindamycin</li> <li>• Percutaneous extraction of the tricuspid valve vegetation using suction filtration and veno-venous bypass</li> <li>• Aspiration of the right knee</li> </ul> |

---

|         |          |                             |                                                      |
|---------|----------|-----------------------------|------------------------------------------------------|
|         |          | cin                         |                                                      |
| Outcome | • Demise | • Discharge after six weeks | • Discharge after six weeks<br>and lost to follow-up |
